# Supplementary material for: Susceptibility to innate immune activation in genetically mediated myocarditis
Source: PubMed Central journal article supplement (PMC11213508; doi:10.1172/jci180254), 2024-05-16

Figure 1D

**DP1 330 kDa**  
**DP2 260 kDa**  
**MYBPC 150 kDa**  
**PKP2 92 kDa**

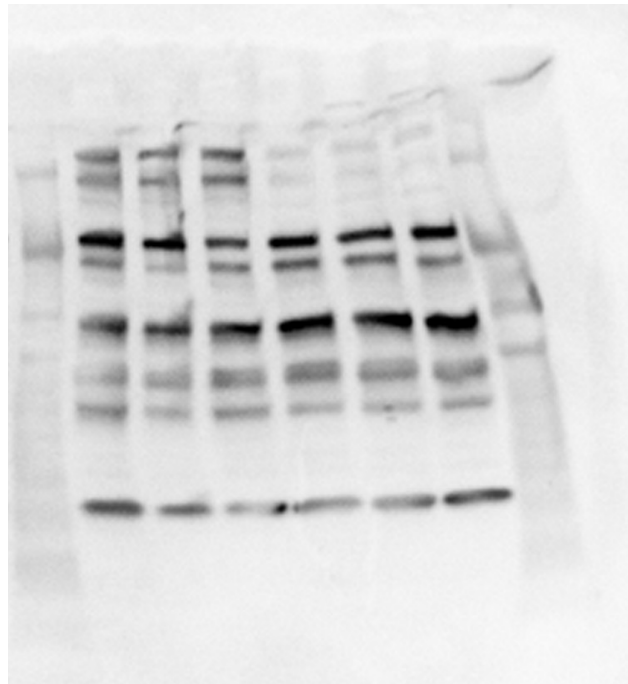

Figure 1D

Cxn43 43 kDa

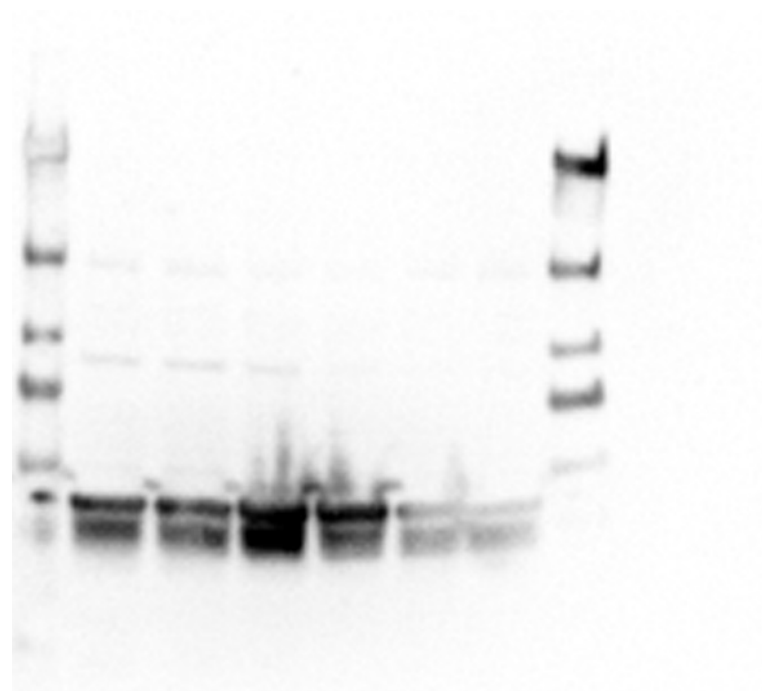

Figure 1D

Memcode 260 kDa

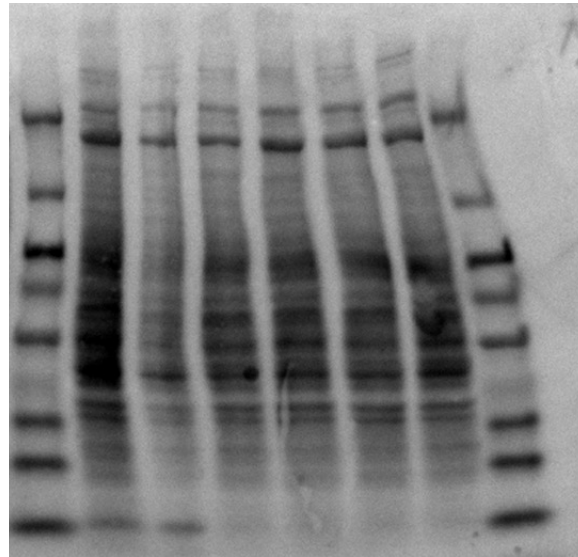

Figure 3I

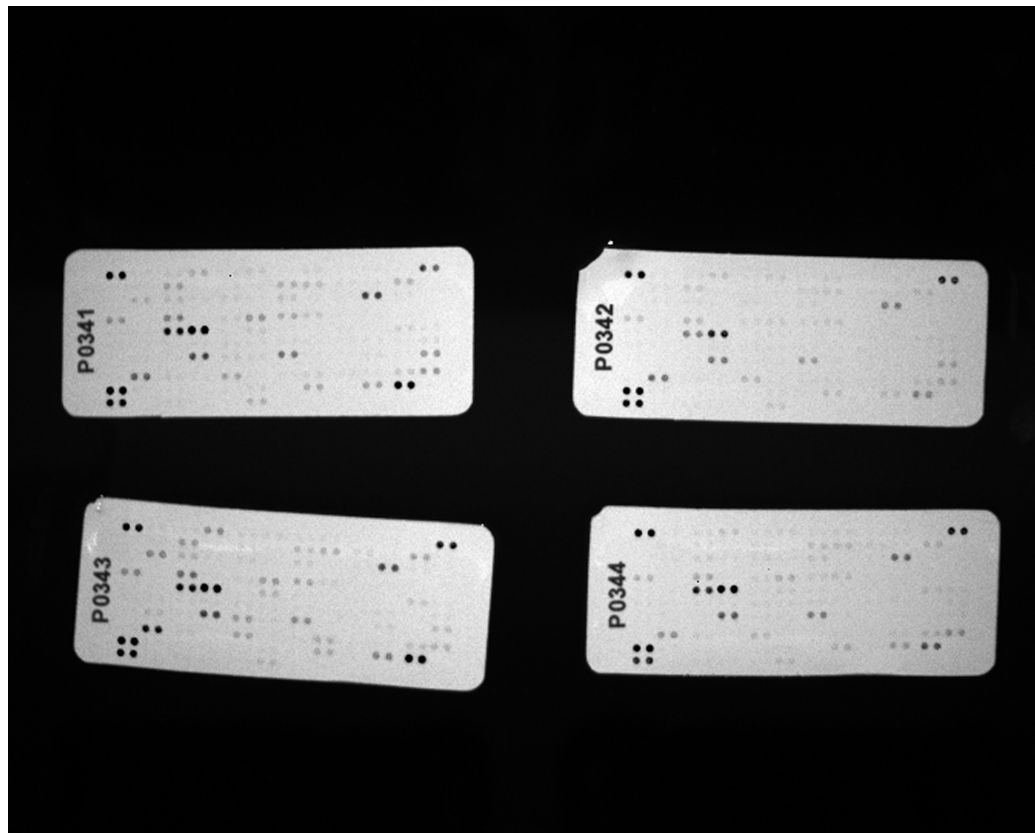

Figure 6D

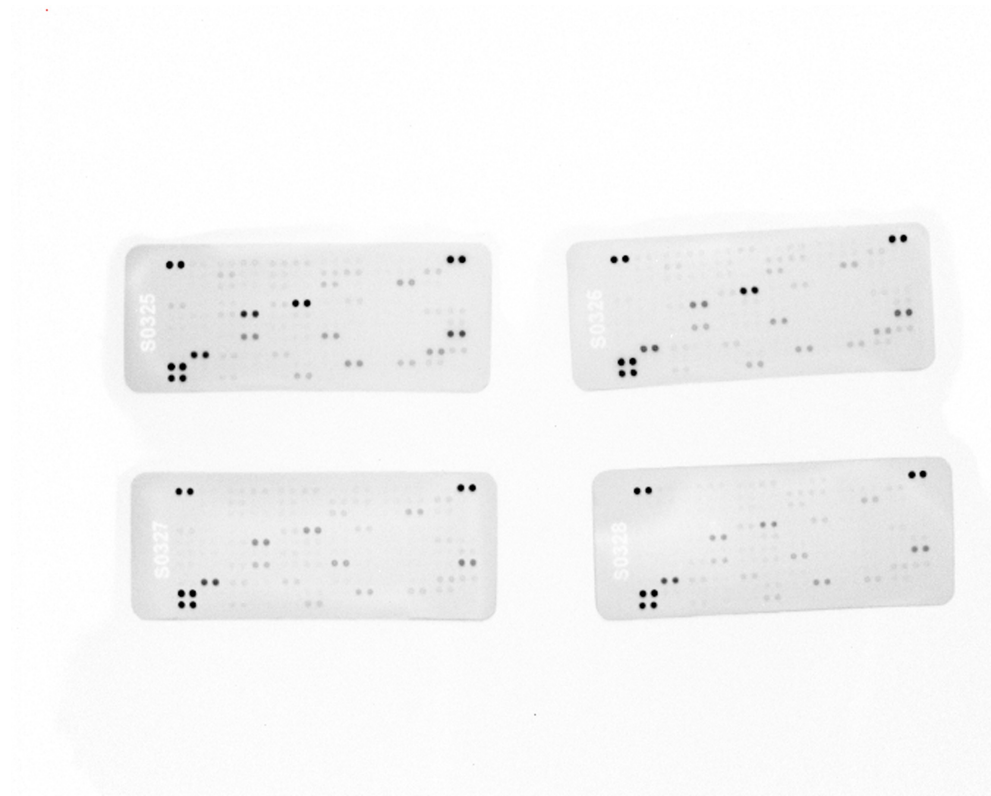

Figure 7G

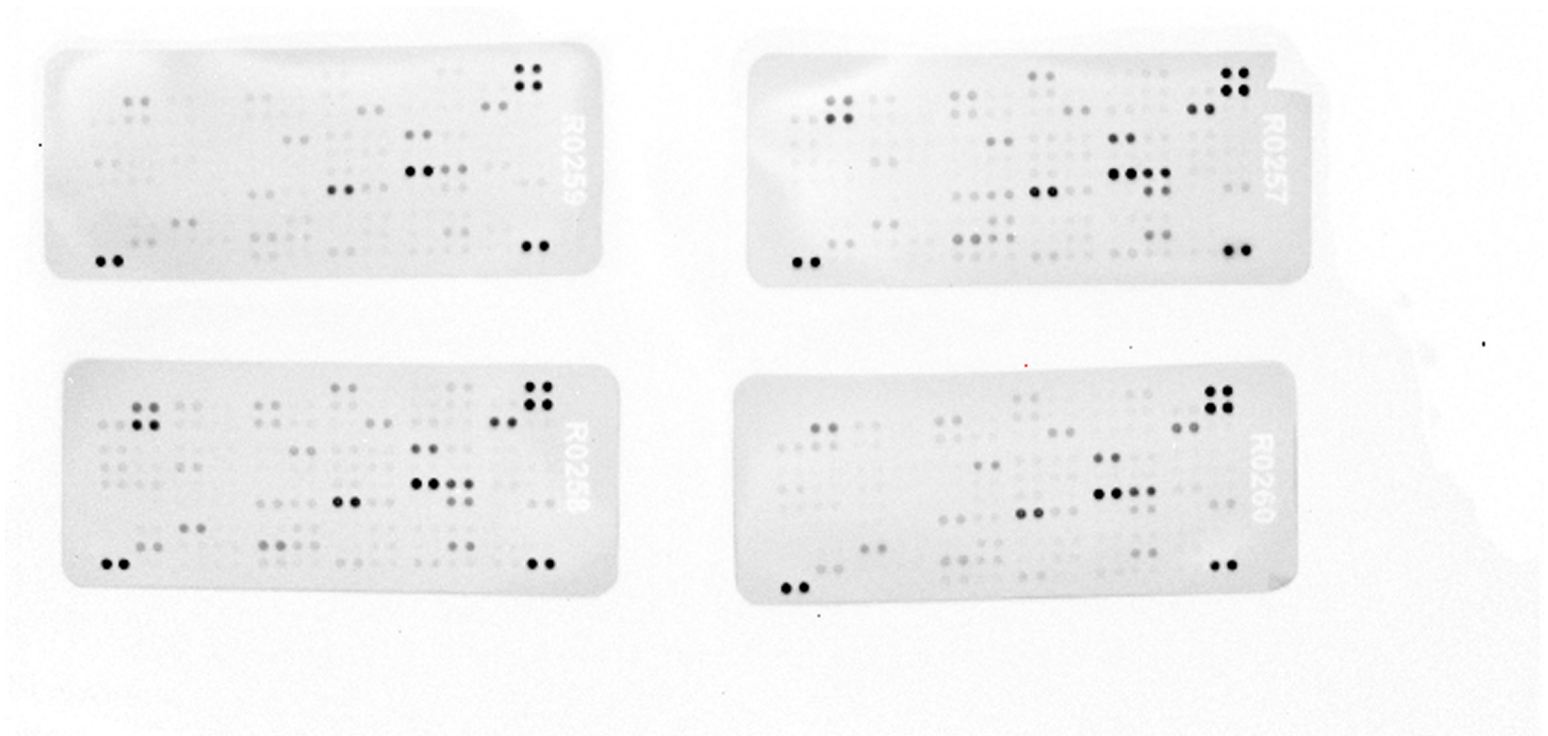

Figure 8C

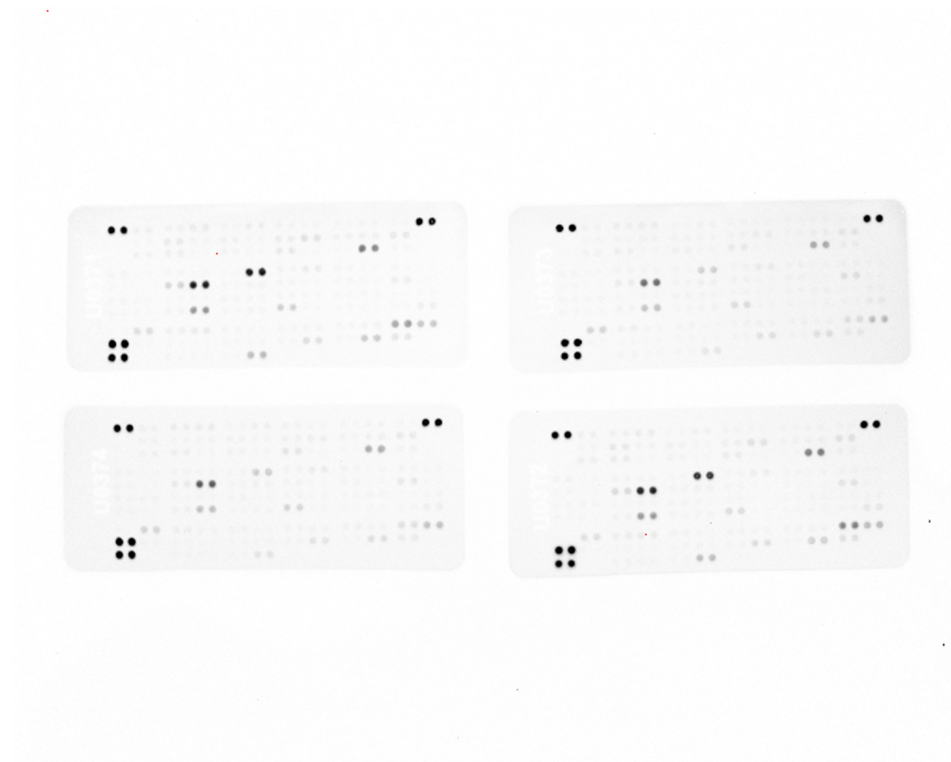

# Supplemental Figure 10B

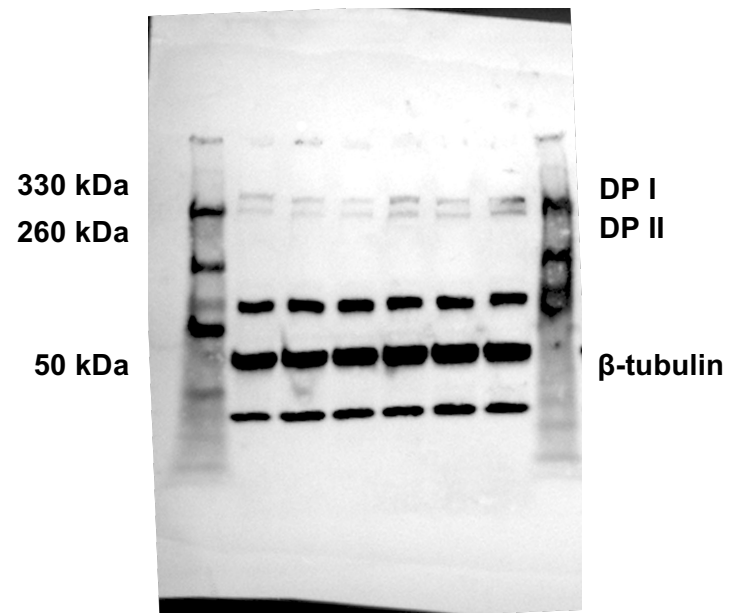



# Supplemental Figure 10B

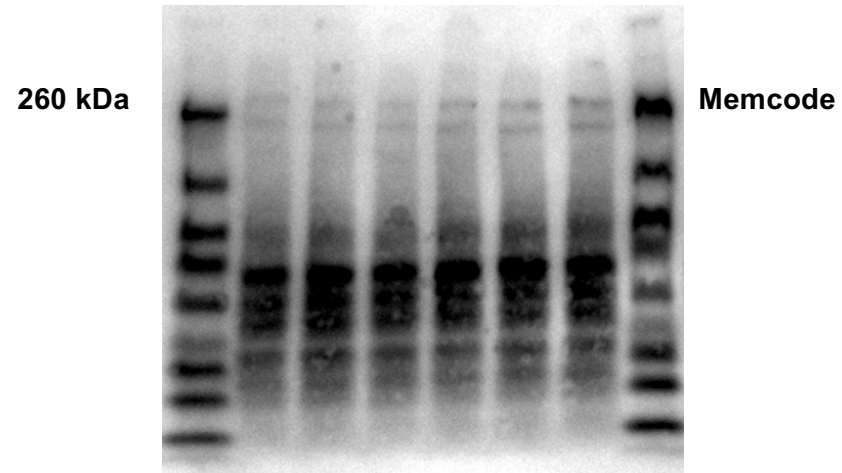

Supplement: jci-134-180254-s252.pdf [file jci-134-180254-s252.pdf]
